# Supplementary material for: Multiple gene mutations identified in patients infected with influenza A (H7N9) virus
Source: PubMed Central journal article supplement (PMC4860572; doi:10.1038/srep25614), 2016-05-09
Supplement: srep25614-s1.pdf [file srep25614-s1.pdf]

## **Multiple gene mutations identified in patients infected with influenza A (H7N9) virus**

<sup>1</sup> Cuicui Chen\*, <sup>2</sup>Mingbang Wang\*, <sup>3</sup>Zhaoqin Zhu\*, <sup>4</sup>Jieming Qu\*, <sup>1</sup>Xiangda Lao\*, <sup>5</sup>Eric Seeley\*,  
<sup>3</sup>Xiuhong Xi\*, <sup>1</sup>Xinjun Tang\*, <sup>3</sup> Tao Li, <sup>6</sup>Xiaomei Fan, <sup>7</sup>Chunling Du, <sup>1</sup>Qin Wang, <sup>2</sup>Lin Yang,  
<sup>3</sup>Yunwen Hu, <sup>1</sup>Chunxue Bai, <sup>4</sup>Zhiyong Zhang, <sup>3</sup>Shuihua Lu<sup>#</sup>, <sup>1,3,7</sup>Yuanlin Song<sup>#</sup>, <sup>2</sup>Wenhao Zhou<sup>#</sup>

<sup>1</sup>Department of Pulmonary Medicine, Zhongshan Hospital, Fudan University;

<sup>2</sup> Key Laboratory of Birth Defects, Children's Hospital of Fudan University, Shanghai, China;

Division of Neonatology, Children's Hospital of Fudan University, China;

<sup>3</sup>Department of Tuberculosis, Shanghai Public Health Clinical Center ,Fudan University;

<sup>4</sup>Department of Pulmonary Medicine, Shanghai Jiao-Tong University School of Medicine;

<sup>5</sup>Division of Pulmonary and Critical Care Medicine, University of California, San Francisco;

<sup>6</sup>BGI-tech, BGI-Shenzhen, Shenzhen, China.

<sup>7</sup>Department of Pulmonary Medicine, Qingpu Central Hospital, Fudan University.

\*Those authors contributed equally to this work.

# correspondence to:

Shuihua Lu, M.D.

Department of Tuberculosis; Shanghai Public Health Clinical Center

Email: lushuihua66@126.com

Yuanlin Song, M.D.

Department of Pulmonary Medicine, Zhongshan Hospital, Fudan University

180 Fenglin Road, Shanghai, 200032, PRChina

Tel: 86-21-64041990-2963

Email: ylsong70@163.com

Wenhao Zhou, M.D., Ph.D.

Key Laboratory of Birth Defects, Children's Hospital of Fudan University, Shanghai, China;

Division of Neonatology, Children's Hospital of Fudan University, China

Email: zwhchfu@126.com

Table S1. The 89 exonic SNVs and their mutation rate in various groups.

| Gene  | Chr    | Pos       | Ref | Alt | Fun    | Exonic Func       | 1000 Genome | Inhouse | dbSNP       | P1 | P2 | P3 | P4            | P5            | P6            | P7            | P8 | case Ref | case Alt | con Ref | con Alt     | Fisher Exact Test P-value |
|-------|--------|-----------|-----|-----|--------|-------------------|-------------|---------|-------------|----|----|----|---------------|---------------|---------------|---------------|----|----------|----------|---------|-------------|---------------------------|
| CPT2  | chr 1  | 53679028  | G   | A   | exonic | nonsynonymous SNV |             | 0.0008  |             | -  | -  | -  | -             | -             | het:3<br>2,36 | -             | -  | 15       | 1        | 1599    | 1           | 0.019710021               |
| LEP   | chr 7  | 127892124 | A   | G   | exonic | nonsynonymous SNV | 0.0005      | 0.0024  | rs148407750 | -  | -  | -  | -             | -             | het:6<br>7,61 | -             | -  | 15       | 1        | 1597    | 3           | 0.039055387               |
| DNMT1 | chr 19 | 10251572  | G   | C   | exonic | synonymous SNV    | 0.0037      | 0.0072  | rs144675407 | -  | -  | -  | -             | -             | -             | het:2<br>9,20 | 15 | 1        | 1589     | 11      | 0.112914886 |                           |
| IL1B  | chr 2  | 113590390 | G   | A   | exonic | synonymous SNV    | 0.15        | 0.0144  | rs1143634   | -  | -  | -  | het:3<br>0,24 | -             | -             | -             | -  | 15       | 1        | 1577    | 23          | 0.213791053               |
| TLR2  | chr 4  | 154625259 | A   | G   | exonic | synonymous SNV    | 0.0023      | 0.0239  | rs144038898 | -  | -  | -  | -             | het:3<br>0,42 | -             | -             | -  | 15       | 1        | 1562    | 38          | 0.32478413                |
| CES1  | chr 16 | 55855361  | G   | T   | exonic | nonsynonymous SNV | 0.04        | 0.0311  | rs2307227   | -  | -  | -  | -             | -             | het:2<br>5,13 | -             | -  | 15       | 1        | 1551    | 49          | 0.396649049               |
| IL1B  | chr 2  | 113591114 | G   | A   | exonic | synonymous        | 0.01        | 0.0335  | rs140794289 | -  | -  | -  | -             | -             | -             | het:2<br>0,13 | -  | 15       | 1        | 1547    | 53          | 0.420954673               |



|          |        |              |   |   |        |                   |      |        |               |   |   |             |               |   |              |   |               |    |   |      |      |                 |
|----------|--------|--------------|---|---|--------|-------------------|------|--------|---------------|---|---|-------------|---------------|---|--------------|---|---------------|----|---|------|------|-----------------|
| DQB1     | 6      | 2647         |   |   | nic    | onynous SNV       |      |        | 390           |   |   |             | 0,7           |   |              |   |               |    |   |      | 7012 |                 |
| HLA-DQB1 | chr 6  | 3263<br>2688 | T | A | exonic | nonsynonymous SNV | 0.2  | 0.0789 | rs1071<br>637 | - | - | -           | hom:<br>0,10  | - | -            | - | -             | 14 | 2 | 1474 | 126  | 0.36575<br>7012 |
| HLA-DQB1 | chr 6  | 3263<br>4313 | C | G | exonic | nonsynonymous SNV | 0.21 | 0.0885 | rs1049<br>059 | - | - | -           | hom:<br>0,16  | - | -            | - | -             | 14 | 2 | 1459 | 141  | 0.64622<br>3667 |
| LEPR     | chr 1  | 6606<br>7109 | T | C | exonic | synonymous SNV    | 0.19 | 0.0957 | rs1805<br>134 | - | - | -           | het:3<br>3,29 | - | -            | - | -             | 15 | 1 | 1447 | 153  | 1               |
| HLA-DQB1 | chr 6  | 3263<br>4369 | C | A | exonic | nonsynonymous SNV | 0.21 | 0.0981 | rs1049<br>056 | - | - | -           | hom:<br>0,12  | - | -            | - | -             | 14 | 2 | 1444 | 156  | 0.66499<br>5324 |
| HLA-DQB1 | chr 6  | 3263<br>2820 | C | G | exonic | nonsynonymous SNV | 0.22 | 0.11   | rs1130<br>375 | - | - | hom:<br>0,8 | -             | - | -            | - | -             | 14 | 2 | 1424 | 176  | 0.69352<br>4126 |
| HLA-DQB1 | chr 6  | 3263<br>2770 | A | G | exonic | nonsynonymous SNV | 0.28 | 0.1124 | rs1049<br>069 | - | - | -           | hom:<br>0,6   | - | -            | - | -             | 14 | 2 | 1421 | 179  | 0.69801<br>6409 |
| CES1     | chr 16 | 5586<br>2762 | C | G | exonic | synonymous SNV    |      | 0.1124 | rs3826<br>194 | - | - | -           | -             | - | het:2<br>8,7 | - | -             | 15 | 1 | 1421 | 179  | 1               |
| ABC B1   | chr 7  | 8716<br>0618 | A | T | exonic | nonsynonymous SNV |      | 0.1244 | rs2032<br>582 | - | - | -           | -             | - | -            | - | het:4<br>7,47 | 15 | 1 | 1401 | 199  | 0.70943<br>5825 |

|          |        |           |   |   |        |                   |      |        |            |   |          |           |           |           |          |           |   |    |   |      |     |             |
|----------|--------|-----------|---|---|--------|-------------------|------|--------|------------|---|----------|-----------|-----------|-----------|----------|-----------|---|----|---|------|-----|-------------|
| HLA-DQB1 | chr 6  | 32629868  | A | G | exonic | synonymous SNV    | 0.18 | 0.134  | rs1049088  | - | -        | -         | hom:0,23  | -         | -        | -         | - | 14 | 2 | 1386 | 214 | 1           |
| CRP      | chr 1  | 159683438 | C | G | exonic | synonymous SNV    | 0.04 | 0.1364 | rs1800947  | - | -        | -         | -         | het:54,45 | -        | het:47,52 | - | 14 | 2 | 1382 | 218 | 1           |
| CPT2     | chr 1  | 53679229  | A | G | exonic | nonsynonymous SNV | 0.13 | 0.1368 | rs1799822  | - | het:5,19 | -         | -         | het:24,22 | -        | -         | - | 14 | 2 | 1382 | 218 | 1           |
| HLA-DQB1 | chr 6  | 32632745  | G | A | exonic | nonsynonymous SNV | 0.33 | 0.1388 | rs1063318  | - | -        | -         | hom:0,11  | -         | -        | -         | - | 14 | 2 | 1378 | 222 | 1           |
| HLA-DQA1 | chr 6  | 32609195  | G | A | exonic | nonsynonymous SNV | 0.09 | 0.1675 | rs36219699 | - | -        | hom:0,30  | -         | -         | -        | -         | - | 14 | 2 | 1332 | 268 | 1           |
| IL1A     | chr 2  | 113537223 | C | A | exonic | nonsynonymous SNV | 0.2  | 0.1675 | rs17561    | - | -        | -         | het:30,24 | het:14,21 | -        | het:20,30 | - | 13 | 3 | 1332 | 268 | 0.740919053 |
| HLA-DQB1 | chr 6  | 32629963  | C | T | exonic | nonsynonymous SNV | 0.2  | 0.177  | rs1049100  | - | -        | -         | hom:0,21  | -         | -        | -         | - | 14 | 2 | 1317 | 283 | 0.752136224 |
| MX1      | chr 21 | 42812891  | C | T | exonic | synonymous SNV    | 0.36 | 0.177  | rs467960   | - | -        | het:29,36 | -         | -         | -        | -         | - | 15 | 1 | 1317 | 283 | 0.332738289 |
| CES1     | chr 16 | 55862691  | G | A | exonic | nonsynonymous     | 0.38 | 0.1794 | rs62028647 | - | -        | -         | -         | -         | het:28,7 | -         | - | 15 | 1 | 1313 | 287 | 0.332096782 |



|            |           |              |   |   |            |                           |      |        |                |               |               |              |               |               |              |               |               |    |   |      |     |                 |
|------------|-----------|--------------|---|---|------------|---------------------------|------|--------|----------------|---------------|---------------|--------------|---------------|---------------|--------------|---------------|---------------|----|---|------|-----|-----------------|
| M3         | 1         | 49           |   |   | nic        | mous<br>SNV               |      |        | 3885           |               |               | 7,14         |               |               |              |               |               |    |   |      |     | 5157            |
| HLA-DQA1   | chr<br>6  | 3260<br>9173 | C | G | exo<br>nic | nonsyn<br>onymo<br>us SNV | 0.4  | 0.2656 | rs1009<br>3    | -             | -             | -            | hom:<br>0,36  | -             | -            | -             | -             | 14 | 2 | 1176 | 424 | 0.26404<br>7871 |
| HLA-DQB1   | chr<br>6  | 3262<br>9904 | A | G | exo<br>nic | synony<br>mous<br>SNV     | 0.6  | 0.2656 | rs1049<br>086  | -             | -             | hom:<br>0,7  | -             | -             | -            | -             | -             | 14 | 2 | 1176 | 424 | 0.26404<br>7871 |
| HLA-DQA1   | chr<br>6  | 3260<br>9147 | A | T | exo<br>nic | nonsyn<br>onymo<br>us SNV | 0.19 | 0.2679 | rs1272<br>2051 | -             | -             | hom:<br>0,36 | -             | -             | -            | -             | -             | 14 | 2 | 1172 | 428 | 0.26299<br>5374 |
| HLA-DQA1   | chr<br>6  | 3261<br>0436 | T | C | exo<br>nic | synony<br>mous<br>SNV     | 0.61 | 0.2679 | rs1048<br>372  | -             | -             | -            | hom:<br>0,32  | -             | -            | -             | -             | 14 | 2 | 1172 | 428 | 0.26299<br>5374 |
| HLA-DQA1   | chr<br>6  | 3261<br>0535 | A | C | exo<br>nic | synony<br>mous<br>SNV     | 0.57 | 0.2703 | rs11301<br>16  | -             | -             | hom:<br>0,52 | -             | -             | -            | -             | -             | 14 | 2 | 1168 | 432 | 0.26218<br>8523 |
| HLA-DQA1   | chr<br>6  | 3260<br>9813 | T | C | exo<br>nic | synony<br>mous<br>SNV     | 0.66 | 0.2919 | rs7079<br>51   | -             | -             | hom:<br>0,25 | -             | -             | -            | -             | -             | 14 | 2 | 1133 | 467 | 0.17478<br>2886 |
| PPAR<br>G  | chr<br>3  | 1247<br>5557 | C | T | exo<br>nic | synony<br>mous<br>SNV     | 0.12 | 0.3086 | rs3856<br>806  | het:3<br>9,31 | -             | -            | -             | het:2<br>5,33 | -            | -             | het:3<br>3,22 | 13 | 3 | 1107 | 493 | 0.41714<br>3794 |
| IFIT<br>M3 | chr1<br>1 | 3207<br>72   | A | G | exo<br>nic | synony<br>mous<br>SNV     | 0.21 | 0.3101 | rs1225<br>2    | -             | hom:<br>0,119 | -            | hom:<br>0,114 | -             | hom:<br>0,99 | het:5<br>7,60 | het:6<br>5,65 | 8  | 8 | 1104 | 496 | 0.11020<br>9014 |

|          |        |           |   |   |        |                   |      |        |             |           |           |           |          |           |           |           |           |    |    |      |     |             |
|----------|--------|-----------|---|---|--------|-------------------|------|--------|-------------|-----------|-----------|-----------|----------|-----------|-----------|-----------|-----------|----|----|------|-----|-------------|
| HLA-DRB1 | chr 6  | 32549596  | T | C | exonic | nonsynonymous SNV |      | 0.311  | rs111823233 | -         | -         | -         | hom:0,7  | -         | -         | -         | -         | 14 | 2  | 1103 | 497 | 0.171375278 |
| MX1      | chr 21 | 42821113  | T | C | exonic | synonymous SNV    | 0.35 | 0.3278 | rs2070229   | hom:0,83  | hom:1,80  | -         | -        | hom:0,78  | -         | het:53,41 | -         | 9  | 7  | 1076 | 524 | 0.422944246 |
| TLR3     | chr 4  | 187004074 | C | T | exonic | nonsynonymous SNV | 0.25 | 0.3324 | rs3775291   | hom:0,68  | het:32,20 | -         | hom:0,43 | hom:1,44  | -         | hom:0,50  | het:27,31 | 6  | 10 | 1069 | 531 | 0.028998842 |
| HLA-DQB1 | chr 6  | 32629859  | A | G | exonic | synonymous SNV    | 0.65 | 0.3421 | rs1049130   | -         | -         | hom:0,4   | hom:0,22 | -         | -         | -         | -         | 12 | 4  | 1053 | 547 | 0.59863218  |
| HLA-DQB1 | chr 6  | 32629847  | A | G | exonic | synonymous SNV    | 0.8  | 0.3541 | rs1049133   | -         | -         | hom:0,4   | hom:0,17 | -         | -         | -         | -         | 12 | 4  | 1034 | 566 | 0.444388806 |
| GHR L    | chr 3  | 10331457  | G | T | exonic | nonsynonymous SNV | 0.09 | 0.3612 | rs696217    | -         | hom:0,76  | -         | -        | -         | -         | het:51,52 | -         | 13 | 3  | 1023 | 577 | 0.194240734 |
| TLR3     | chr 4  | 187004217 | C | T | exonic | synonymous SNV    | 0.28 | 0.3702 | rs3775290   | -         | -         | het:38,33 | -        | -         | het:31,28 | -         | het:33,44 | 13 | 3  | 1008 | 592 | 0.192232214 |
| DNM T1   | chr 19 | 10291181  | T | C | exonic | nonsynonymous SNV | 0.06 | 0.3756 | rs16999593  | het:54,43 | -         | het:53,30 | -        | het:52,53 | -         | het:45,55 | -         | 12 | 4  | 1000 | 600 | 0.437380251 |
| HLA-DQA1 | chr 6  | 32610461  | A | G | exonic | nonsynonymous     | 0.78 | 0.4115 | rs9260      | -         | -         | hom:0,41  | hom:0,31 | -         | -         | -         | -         | 12 | 4  | 942  | 658 | 0.21390613  |



|            |           |              |   |   |            |                           |      |        |               |               |               |               |               |               |               |               |               |    |    |     |          |                 |
|------------|-----------|--------------|---|---|------------|---------------------------|------|--------|---------------|---------------|---------------|---------------|---------------|---------------|---------------|---------------|---------------|----|----|-----|----------|-----------------|
| B1         | 7         | 0618         |   |   | nic        | onymo<br>us SNV           |      |        | 582           | 6,44          | 4,45          | 8,40          | 3,42          | 5,39          |               | 5,41          |               |    |    |     |          | 5592            |
| MX1        | chr<br>21 | 4282<br>4661 | A | G | exo<br>nic | synony<br>mous<br>SNV     | 0.27 | 0.5215 | rs1050<br>008 | -             | -             | het:8<br>9,85 | het:7<br>7,71 | -             | het:6<br>7,64 | het:7<br>8,75 | -             | 12 | 4  | 766 | 834      | 0.04206<br>6821 |
| IFNA<br>R1 | chr<br>21 | 3471<br>5699 | G | C | exo<br>nic | nonsyn<br>onymo<br>us SNV | 0.21 | 0.5239 | rs2257<br>167 | -             | -             | hom:<br>0,80  | het:4<br>9,45 | -             | het:5<br>7,54 | -             | het:5<br>4,59 | 11 | 5  | 762 | 838      | 0.12991<br>9992 |
| DNM<br>T1  | chr<br>19 | 1027<br>3372 | T | C | exo<br>nic | nonsyn<br>onymo<br>us SNV | 0.18 | 0.5383 | rs2228<br>612 | het:1<br>9,21 | -             | het:2<br>8,24 | het:2<br>0,22 | het:2<br>2,20 | -             | het:2<br>1,31 | -             | 11 | 5  | 739 | 861      | 0.08161<br>176  |
| RPAI<br>N  | chr<br>17 | 5326<br>145  | C | G | exo<br>nic | nonsyn<br>onymo<br>us SNV | 0.43 | 0.6017 | rs1276<br>1   | hom:<br>0,24  | hom:<br>0,24  | hom:<br>0,27  | het:1<br>3,10 | hom:<br>0,34  | hom:<br>0,20  | hom:<br>0,25  | het:2<br>3,12 | 2  | 14 | 638 | 962      | 0.03650<br>0478 |
| LEPR       | chr<br>1  | 6610<br>2257 | G | A | exo<br>nic | synony<br>mous<br>SNV     | 0.54 | 0.61   | rs1805<br>096 | hom:<br>0,104 | het:6<br>2,34 | het:5<br>3,38 | hom:<br>0,105 | hom:<br>0,104 | het:4<br>1,38 | hom:<br>0,122 | hom:<br>0,112 | 3  | 13 | 624 | 976      | 0.12383<br>3455 |
| DNM<br>T1  | chr<br>19 | 1026<br>7077 | T | C | exo<br>nic | synony<br>mous<br>SNV     | 0.54 | 0.6388 | rs2228<br>611 | het:2<br>8,27 | hom:<br>0,70  | het:2<br>8,30 | het:3<br>2,34 | hom:<br>0,58  | hom:<br>0,42  | hom:<br>0,62  | hom:<br>0,47  | 3  | 13 | 578 | 102<br>2 | 0.19402<br>3134 |
| MBL2       | chr<br>10 | 5452<br>8266 | G | C | exo<br>nic | synony<br>mous<br>SNV     | 0.77 | 0.6388 | rs9305<br>07  | hom:<br>0,85  | hom:<br>0,88  | het:4<br>4,41 | hom:<br>0,75  | het:4<br>5,55 | hom:<br>0,60  | hom:<br>0,97  | het:4<br>2,47 | 3  | 13 | 578 | 102<br>2 | 0.19402<br>3134 |
| ABC<br>B1  | chr<br>7  | 8713<br>8645 | A | G | exo<br>nic | synony<br>mous<br>SNV     | 0.6  | 0.6507 | rs1045<br>642 | het:5<br>8,43 | het:3<br>5,39 | het:4<br>9,39 | het:4<br>8,52 | het:3<br>7,30 | -             | het:4<br>2,47 | het:3<br>6,43 | 9  | 7  | 559 | 104<br>1 | 0.11099<br>8732 |

|            |           |                   |   |   |            |                           |      |        |               |               |               |               |               |               |               |               |               |   |    |     |          |                 |
|------------|-----------|-------------------|---|---|------------|---------------------------|------|--------|---------------|---------------|---------------|---------------|---------------|---------------|---------------|---------------|---------------|---|----|-----|----------|-----------------|
| CPT2       | chr<br>1  | 5367<br>6448      | G | A | exo<br>nic | nonsyn<br>onyno<br>us SNV | 0.5  | 0.669  | rs1799<br>821 | hom:<br>0,38  | hom:<br>0,35  | het:2<br>6,22 | hom:<br>0,42  | het:1<br>1,21 | hom:<br>0,39  | hom:<br>0,49  | hom:<br>0,54  | 2 | 14 | 530 | 107<br>0 | 0.10797<br>6012 |
| NOS3       | chr<br>7  | 1506<br>9572<br>6 | T | C | exo<br>nic | synony<br>mous<br>SNV     | 0.78 | 0.6699 | rs1549<br>758 | hom:<br>0,8   | -             | -             | -             | hom:<br>0,10  | -             | hom:<br>0,7   | hom:<br>0,7   | 8 | 8  | 529 | 107<br>1 | 0.18294<br>7056 |
| LEPR       | chr<br>1  | 6605<br>8513      | A | G | exo<br>nic | nonsyn<br>onyno<br>us SNV | 0.59 | 0.6986 | rs1137<br>101 | hom:<br>0,53  | hom:<br>0,46  | het:3<br>5,25 | hom:<br>0,60  | hom:<br>0,42  | het:2<br>5,24 | hom:<br>0,50  | hom:<br>0,48  | 2 | 14 | 483 | 111<br>7 | 0.17154<br>7862 |
| DNM<br>T1  | chr<br>19 | 1026<br>5312      | T | C | exo<br>nic | synony<br>mous<br>SNV     | 0.99 | 0.7297 | rs7211<br>86  | hom:<br>0,39  | hom:<br>0,32  | hom:<br>0,38  | hom:<br>0,32  | hom:<br>0,34  | hom:<br>0,23  | hom:<br>0,47  | hom:<br>0,38  | 0 | 16 | 433 | 116<br>7 | 0.00938<br>611  |
| LEPR       | chr<br>1  | 6603<br>6441      | A | G | exo<br>nic | nonsyn<br>onyno<br>us SNV | 0.39 | 0.7344 | rs1137<br>100 | hom:<br>0,63  | hom:<br>0,57  | het:1<br>8,34 | het:4<br>2,29 | hom:<br>0,82  | het:1<br>3,35 | hom:<br>0,47  | het:2<br>7,44 | 4 | 12 | 425 | 117<br>5 | 1               |
| IL10R<br>B | chr<br>21 | 3464<br>0788      | A | G | exo<br>nic | nonsyn<br>onyno<br>us SNV | 0.35 | 0.7392 | rs2834<br>167 | hom:<br>0,37  | hom:<br>0,59  | het:3<br>3,18 | het:2<br>6,20 | het:1<br>9,24 | hom:<br>0,46  | hom:<br>0,48  | het:2<br>0,36 | 4 | 12 | 418 | 118<br>2 | 1               |
| ZNF3<br>65 | chr<br>10 | 6415<br>9333      | G | T | exo<br>nic | nonsyn<br>onyno<br>us SNV | 0.49 | 0.7967 | rs3758<br>490 | het:5<br>9,61 | het:6<br>9,57 | het:8<br>8,56 | het:5<br>6,60 | hom:<br>0,119 | hom:<br>0,98  | hom:<br>0,102 | -             | 6 | 10 | 326 | 127<br>4 | 0.11468<br>297  |
| NOS3       | chr<br>7  | 1506<br>96111     | T | G | exo<br>nic | nonsyn<br>onyno<br>us SNV | 0.8  | 0.8732 | rs1799<br>983 | hom:<br>0,52  | hom:<br>0,49  | het:4<br>4,43 | hom:<br>0,63  | hom:<br>0,57  | het:3<br>0,32 | hom:<br>0,64  | hom:<br>0,52  | 2 | 14 | 203 | 139<br>7 | 1               |
| ZNF3<br>65 | chr<br>10 | 6441<br>5184      | A | G | exo<br>nic | nonsyn<br>onyno           | 0.85 | 0.9115 | rs7076<br>156 | hom:<br>0,59  | hom:<br>0,40  | hom:<br>0,58  | hom:<br>0,41  | hom:<br>0,45  | hom:<br>0,48  | hom:<br>0,51  | het:2<br>6,27 | 1 | 15 | 142 | 145<br>8 | 1               |

|        |        |             |   |   |        |                   |        |   |              |            |   |            |   |            |   |   |   |    |   |      |   |             |
|--------|--------|-------------|---|---|--------|-------------------|--------|---|--------------|------------|---|------------|---|------------|---|---|---|----|---|------|---|-------------|
|        |        |             |   |   |        | us SNV            |        |   |              |            |   |            |   |            |   |   |   |    |   |      |   |             |
| DNM T1 | chr 19 | 1026 5333   | A | G | exonic | synonymous SNV    |        | - |              | het:1 8,19 | - | -          | - | -          | - | - | - | 15 | 1 | 1600 | 0 | 0.00990 099 |
| DNM T1 | chr 19 | 1026 5372   | C | T | exonic | synonymous SNV    | 0.0005 | - | rs1403 76680 | -          | - | -          | - | het:1 5,16 | - | - | - | 15 | 1 | 1600 | 0 | 0.00990 099 |
| PPARG  | chr 3  | 1247 5632   | G | A | exonic | synonymous SNV    |        | - |              | -          | - | -          | - | het:2 4,15 | - | - | - | 15 | 1 | 1600 | 0 | 0.00990 099 |
| CES1   | chr 16 | 5584 4509   | T | C | exonic | nonsynonymous SNV |        | - |              | -          | - | -          | - | het:9 1,60 | - | - | - | 15 | 1 | 1600 | 0 | 0.00990 099 |
| TLR4   | chr 9  | 1204 7089 4 | C | G | exonic | synonymous SNV    |        | - |              | -          | - | het:5 6,52 | - | -          | - | - | - | 15 | 1 | 1600 | 0 | 0.00990 099 |
